# Supplementary material
Source: PubMed Central journal article supplement (PMC4965838)
Supplement: am6b06275_si_001.pdf [file am6b06275_si_001.pdf]

SUPPORTING INFORMATION

# Assembly and immunological processing of polyelectrolyte multilayers composed of antigens and adjuvants

Yu-Chieh Chiu,<sup>†</sup> Joshua M. Gammon,<sup>†</sup> James I. Andorko,<sup>†</sup> Lisa H. Tostanoski,<sup>†</sup> and Christopher M. Jewell\*,<sup>†</sup>, <sup>‡</sup>, <sup>§</sup>

<sup>†</sup> Fischell Department of Bioengineering, University of Maryland, College Park, 8228 Paint Branch Drive, Room 2212 Jeong H. Kim Building, College Park, MD, 20742, United States

<sup>‡</sup> Department of Microbiology and Immunology, University of Maryland Medical School, 685 West Baltimore Street, HSF-I Suite 380, Baltimore, MD, 21201, United States

<sup>§</sup> Marlene and Stewart Greenebaum Cancer Center, 22 S. Greene Street, Suite N9E17, Baltimore, MD 21201, United States

\* To whom correspondence should be addressed: Prof. Christopher M. Jewell, Fischell Department of Bioengineering, University of Maryland, 8228 Paint Branch Drive, Room 2212 Jeong H. Kim Building, College Park, MD 20742. Office: 301-405-9628, Fax: 301-405-9953, E-mail: cmjewell@umd.edu, Web: jewell.umd.edu

## SUPPORTING FIGURES AND LEGENDS

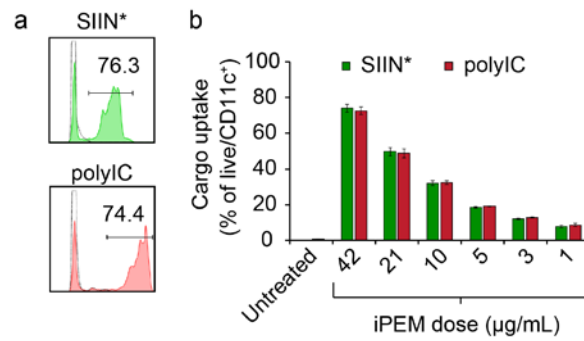

**Figure S1.** iPEM capsules are internalized by primary DCs. a) Representative histograms demonstrating SIIN\* and polyIC uptake during treatment of splenic DCs with (SIIN\*/polyIC)<sub>3</sub> iPEM capsules for 24 hrs. b) Aggregate analysis of dose dependent uptake of (SIIN\*/polyIC)<sub>3</sub> iPEMs. Values indicate the mean ± s.e.m. SIIN\* represents SIINFEKL-R<sub>9</sub>.

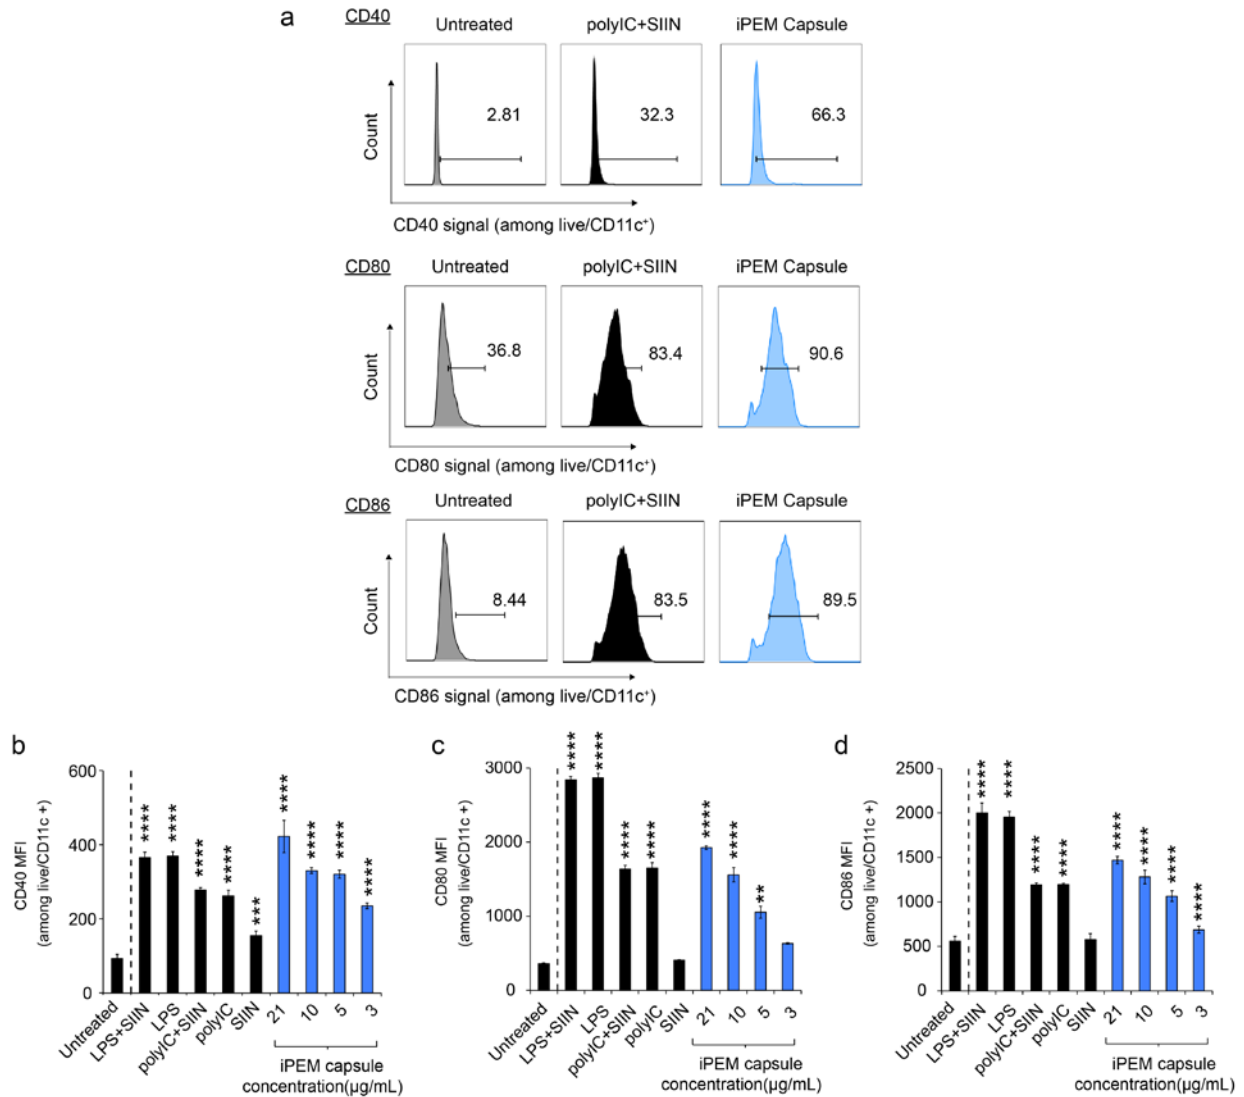

**Figure S2.** *In vitro* activation of DCs by iPEM capsules. a) Representative flow cytometry histograms of CD40, CD80, and CD86 for samples that were untreated, treated with polyIC (10  $\mu\text{g}/\text{mL}$ ) + SIIN (5  $\mu\text{g}/\text{mL}$ ), or treated with iPEM capsules. b-d) Mean fluorescent intensities (MFIs) of (b) CD40, (c) CD80, and (d) CD86 expression after treatment with iPEM capsules for 24 hrs. Values for all panels indicate the mean  $\pm$  s.e.m. Statistical comparisons indicate significance of  $** = p \leq 0.01$ ,  $*** = p \leq 0.001$ , and  $**** = p \leq 0.0001$ , and for clarity, are shown for each group compared against the control (Untreated; dashed line). SIIN represents SIINFEKL.

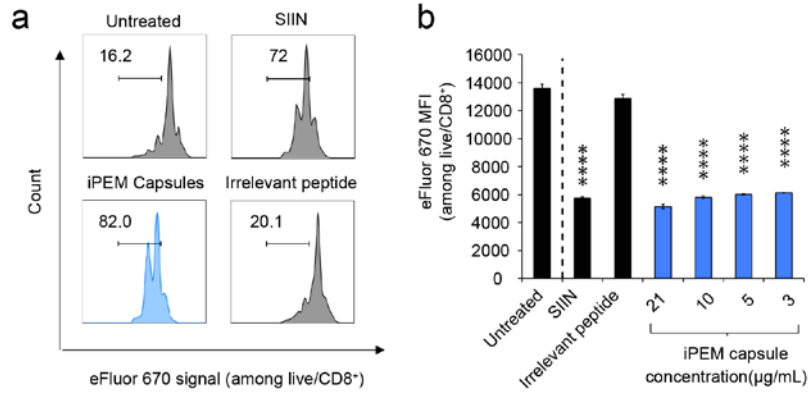

**Figure S3.** iPEM capsules drive antigen-specific T cell expansion *in vitro*. a) Representative histograms showing the frequency of proliferated OT-I CD8<sup>+</sup> T cells after co-culture with untreated DCs or DCs treated with SIIN (5 μg/mL), irrelevant peptide (5 μg/mL), or iPEM capsules (21 μg/mL). Proliferation was quantified using a standard fluorescence proliferation dye (eFluor 670) after 48 hrs. b) MFIs of fluorescent dye used to measure proliferation of CD8<sup>+</sup> T cells analyzed by flow cytometry. Values for all panels indicate the mean ± s.e.m. Statistical comparisons indicate significance of \*\*\*\* =  $p \leq 0.0001$ , and for clarity, are shown for each group compared against the control (Untreated; dashed line). SIIN represents SIINFEKL.
